# Supplementary material for: Room Temperature Magnetic Memory Effect in Nanodiamond/γ-Fe2O3 Composites
Source: MDPI journal article supplement (doi:10.3390/nano11030648), 2021-03-07

## **Supplementary data**

### **Room Temperature Magnetic Memory Effect in Nanodiamond/ $\gamma$ -Fe<sub>2</sub>O<sub>3</sub> Composites**

Ashish Chhaganlal Gandhi, Rajakar Selvam, Chia-Liang Cheng and Sheng Yun Wu<sup>\*</sup>

Department of Physics, National Dong Hwa University, Hualien 97401, Taiwan.

**Figure S1. (a)** Full ZFC  $M(H_a)$  loops and **(b)** magnified ZFC- $M(H_a)$  loops near zero-field measured at 10 K and 300 K from ND-w.

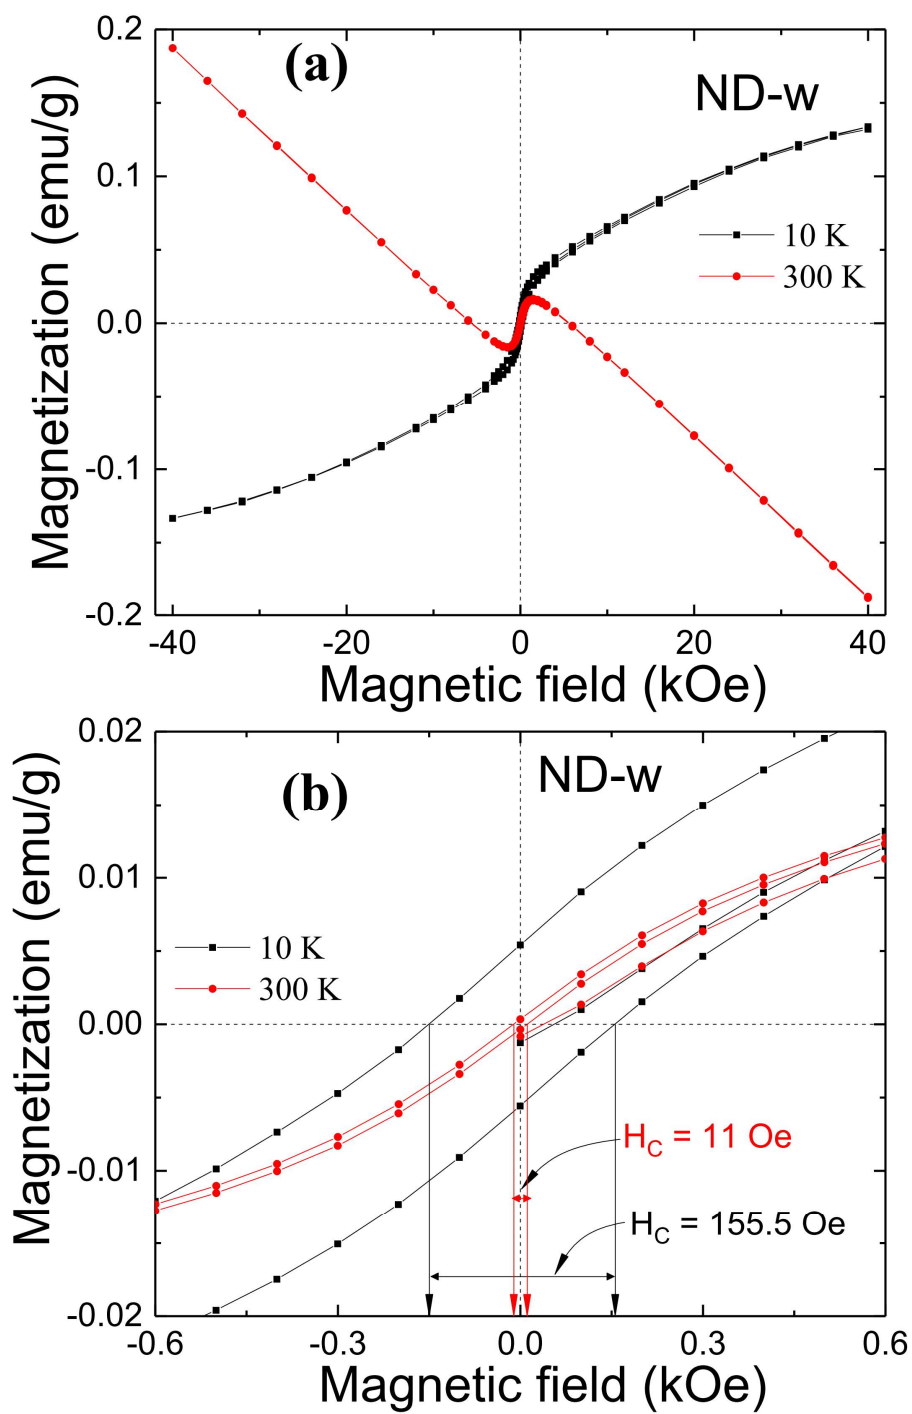

**Figure S2.** ZFC-FC temperature dependent magnetization curve from ND-w measured at 100 Oe.

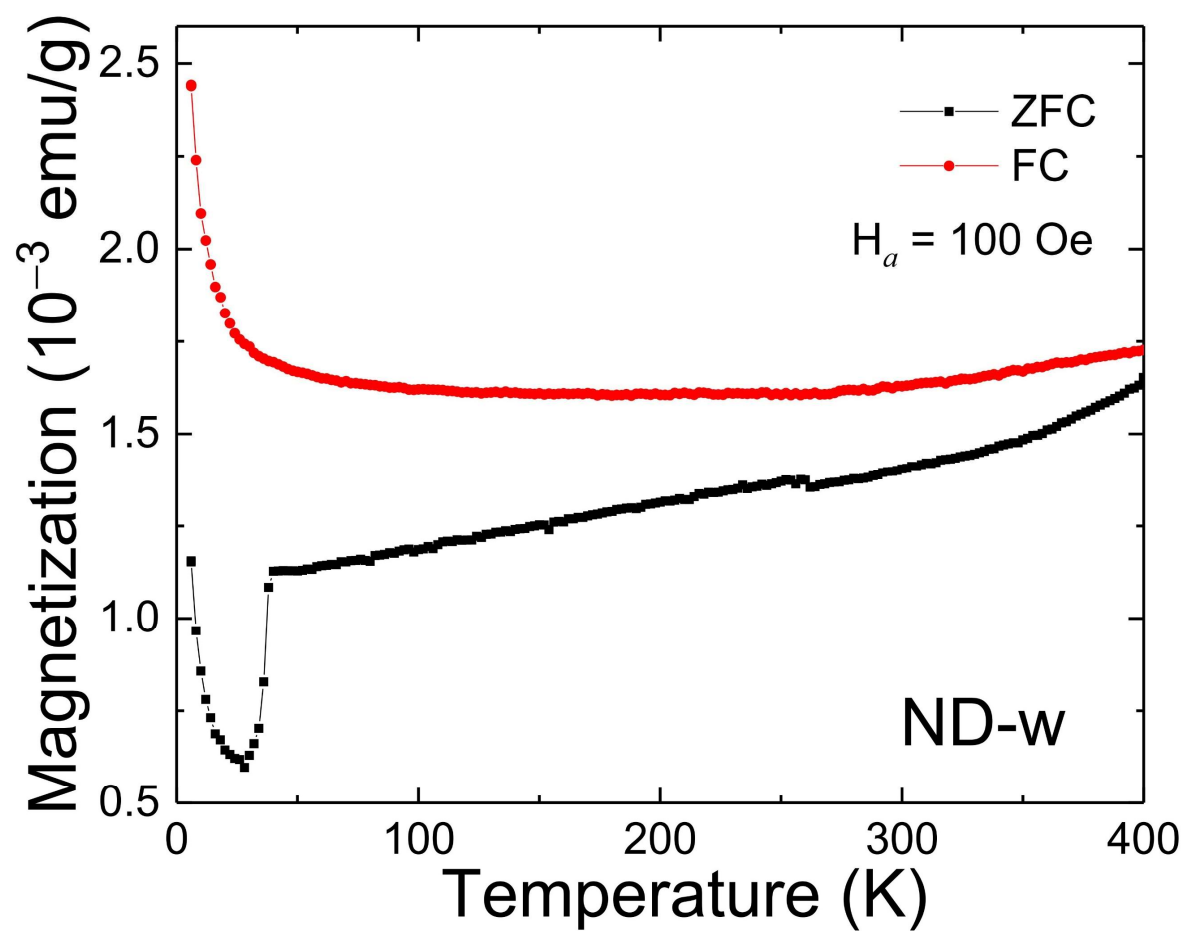

Supplement: s1 [file s1]
